# Supplementary material for: Why Markdown as a Pricing Modality?
Source: Atypon-hosted journal article supplement (doi:10.1287/mnsc.2018.3046), 2018-09-20
Supplement: mnsc.2018.3046-sm-data.xlsx [file mnsc.2018.3046-sm-data.xlsx]

## Sheet: Dresses
DISCOUNT (delta)		bins
60		10	(0, 10]
40		20	(10, 20]
65.0118		30	(20, 30]
65.0125		40	(30, 40]
65.0704		50	(40, 50]
65		60	(50, 60]
65.0314		70	(60, 70]
60		80	(70, 80]
40		90	(80, 90]
65.1397		100	(90, 100]
65.0279
40
65.0667
65.0157
65.0378
65.0218
40
40
65.034
65
65.0667
65.0185
65
65.0149
65.0265
65.042
65.0505
65.0134
65.0382
65.0167
65.0218
65.0314
65.0218
65.0167
65.0296
65.0115
65.0334
65.0179
65.0179
65.0083
65.0157
65.0505
65.0145
65.0139
65.0139
65.0209
65.0147
65.1376
65.0173
65.0251
65.0125
65.0083
65.0114
65.0147
65
65
65.0132
65.0072
65.0133
65.0072
65.0048
65.0649
65.0157
65.041
65.0407
65.0167
65.0201
65.0175
65.0179
65
65.0125
65.0093
65.0132
65.0169
65.0167
65.01
65.0097
65.0256
65.0413
65.0355
65.0209
65.042
65.0388
65.0336
65.0147
65.0732
65.0228
65.0133
65.0459
65.0196
65
65.0147
65.0147
65.0132
65.0157
65.0157
65.0526
65.0251
65.0505
65.0334
65.011
65
65.0279
65
65.0649
65.0649
65.0649
65.0315
65.0147
65.0206
65.0485
65.0231
65.0201
65.0125
65.0201
65.0186
65.0125
65.0196
65.0391
65.0388
65.0323
65.0345
65.0253
65.0251
65.0157
65.0476
65.0132
65.042
65.0086
40
65.0165
65.0132
65.0558
65.0182
65.0105
65.0588
65.0279
65.0526
65.0174
65
65.0122
65.042
65.036
65.0179
40
65.0251
65.0139
65.0139
65.0909
65.0086
65.0152
65.0251
65.0251
65.0251
65.0251
65.0167
65.0167
65.0228
65.0147
65.0132
65.0139
65.027
65.0089
65
65.0228
65.0193
65.0157
65.0209
65.0147
65.01
65.0179
65.0139
65.0209
65.0193
65
65.0222
65.1282
65.0336
65.0186
65.0251
65.0201
65.0173
65.0228
65.0228
65.0179
65.0114
65.0157
65.0125
65.0068
65.0167
65.0167
65.0459
65.0083
65.0109
65.0125
65.0251
65.0139
65.0125
65.0125
65.0104
65.0167
65.0125
65.0303
65.0193
65.0204
65.0132
65.0076
65.0157
65.0157
65.0132
65.0303
65.0147
65.0222
65.0125
65.0193
65.0193
65.0303
65.0334
65.0107
65.0301
65.0083
65.0256
65.0228
65.0505
65
65.0382
65.0485
65.0209
65.0193
65.0602
65.0167
65.0122
65.0386
65.0179
65.0157
65.0157
40
65.0157
65.0279
65.0209
65.0279
65.0179
65.0314
65.0251
65.0147
65.0147
65.0143
65.0251
65.0201
65.0179
65.0179
65.0111
65.0314
65.0209
65.0209
65.0143
65.0143
65.0199
79.0476
40
65.0323
65.0167
65.0135
65.0769
65.0251
65.0251
65.0193
65.0193
65.0251
65.0251
65.0505
65
65.0112
65
65.0132
65.0307
65.0083
65.0096
65.0109
65.0213
65.0063
65
65.006
65.0169
65.0028
65.013
65.0141
65.0163
65.0132
65.0132
65.0147
65.0179
65.0193
65.0072
65.0201
65.0314
65.0239
65.037
65.0083
65.0083
65.0132
65
65.0105
65
65.0104
65.0416
65
65
65
65.0111
65.0107
65
65.0314
65.0314
65
65
65
65
65
65.0691
65.0691
65
65.0388
65.0328
65.0039
65.0125
65
65
65.0228
65.042
65.0072
65.0125
65
65
65
65.0485
65.0334
65.0336
65.0251
65.0042
65
40
65.0215
65.0188
65.015
65
65.0303
65.0133
65.0168
65
65.0303
65.036
65.0365
65.037
65.0769
65.0083
65.0132
65.0101
65.0115
65.0115
65.0109
65.0083
65.0101
65.0558
65.0147
65.0462
65.0284
65
65.0251
65.0314
65.0118
65.0114
65.0031
65
65.0187
65.0265
65.0152
65.0152
65.0218
65.0218
65.0186
65.0083
65.005
65.0769
65.0345
65.0323
65.036
65.0193
65.037
65.0566
65.0323
65.0196
65.0179
65.0157
65.0209
65.0209
65.036
65.036
65.0117
65.0265
65.0157
65.0314
65.0314
65.0212
65.0213
40
65.0256
65.0526
65.01
65.0286
65.0323
65.0167
65.0193
65.0526
65.0147
65.0323
65.0251
65.0256
65.0167
65.0132
65.0588
65.0059
65.0167
40
65.0132
65
65
65
65.0612
65.0273
65.0526
65.0125
65.0047
65.0131
65.0029
65
65.0323
65.0154
25.0154
65.0256
65.0149
65.0093
65.0086
65.0083
65.0125
65.0132
65.0125
65.0109
65.0251
65.0279
65.0251
65.0123
65.0125
65.0157
65.0179
65.0282
65.0279
65.0251
65.0211
65.0209
65.0209
65.0167
65.0251
65.0125
65.0209
65.0209
65.0167
65.0086
65.0158
65.0157
65.0279
65.0314
65.0083
65.0083
65.0125
65.0125
65
65.01
65.0394
65.0456
65.037
65.0139
65
65.0382
65.0584
65.034
65.0138
65.0116
65.0114
65.0179
65.0251
65.0209
65.0157
65.0125
40
65.0588
65.0279
65.0794
40.1058
65.0228
65.0228
65.0251
65.0251
65.0228
65.0228
65.0251
65.0251
65.0174
65.0735
65
65.0154
65.0153
65.0129
65
65
65.0169
65.0186
65.0435
65.0063
65
65.0029
65.0114
65.0129
65.0081
65.0167
65
65.0273
65.0251
65.0125
65.0083
65.0136
65.0206
65.0206
65
65
65
65.0157
65.0157
65.0089
65.0089
65.0125
65.0207
65.0251
65.0139
65.036
65.0251
65.0251
65
65.0242
65
65
65
65.0896
40
65.0215
65.0485
65.0167
65.045
65
65
65
65
65.0345
65.01
65.0139
65.0251
65.042
65.042
65.0139
65.0265
65.0251
65.0201
40
65.0201
65.036
40
65.0251
30.0503
65.042
40
65.0279
40
65.0761
65.0179
65.0209
65.0251
65.0251
40
65.0179
65.0179
40
65.042
40
65.042
40
65.042
40
65.0909
65.0435
65.0476
65.0435
65.0193
65.0193
65.039
64.9996
65
30.0704
65.0199
40
65
40
65
40.0833
65.0216
40
65.0279
40.1117
65.022
40
65.0386
40
65.0251
30.0503
65.0314
30.0629
65
65.0147
65.0147
30
65.0117
65.0117
40
65
65
40
65.0079
33.0048
65.0095
40
65.0132
40
65.0279
65.0279
30
65.0208
65.0209
65.0209
40
65.0296
65.0296
40
65.0228
30
65.0233
65.0233
65.0157
65.0157
40
65.0111
65.0111
40
65.0179
65.0201
65.0201
40.0402
65.0114
40
65.0077
40
40
65.0186
65.0186
30
65.0107
30
65.0083
65.0251
65.0251
30
40
65.0185
65.0186
65.0186
30
65.0174
40
65.0343
65.034
33.0612
65.0811
65.0141
65.0139
50.0279
65.0211
65.0209
40.0837
65.0228
40
65.0157
40
65.0193
40
65.0109
40
65.0141
65.0139
40
65.0139
65.0193
40
65.0141
65.0139
40.0557
65.0123
65.0125
40
65.0176
65.0179
40
65.0193
40.0772
65.0147
40.059
65.0139
40
65.0209
40
65.0132
40
65.0157
40
65.0194
65.0193
40
65.0211
65.0209
40.0837
65.0251
40.1005
65.0194
65.0193
40
65.0279
65.0279
50.0559
65.0228
40
65.0519
40
65.0228
65.0558
50.0372
65.0558
40
65.0794
65.043
40
65.0558
40
65.0456
40.0608
65.0228
50.0457
65.0558
40
65.0667
40
65.0193
40
65.0282
65.0279
40
65.0224
40
65.0292
40
65.034
65.0201
40
65.0251
40
65.0097
40
65.024
30.016
65.0096
40
65.0107
65.0109
40
65.024
40
65.0063
65.0104
40
40
65.0064
40
65.0264
40
65.0193
40.0772
65.0597
65.0593
65.0251
40
65.0345
40
65.0051
40
65.007
65.0072
40
65.0083
40
65.0042
40.017
65.0141
40
65.0203
65.0204
50.0408
65.0209
30
65.0083
65.0083
50
40
65.036
40
65.0152
40
65.0295
65.0296
40
65.0218
65.0218
40
65.0057
65.0193
40
33.0172
65
33.0172
65.0314
25.0314
65.042
33.0252
65.0388
25.0388
65.0149
65.0149
50
65.0179
33.0108
25.0181
65.0179
25.0179
65.0011
40.0105
65.0022
40.0088
65.001
65
65
40
65.0179
30
65.0336
40.0671
65.0256
65.0435
33.0435
65.0667
33.0667
33.0303
65.0251
33.0151
65
65
33.0208
65.0345
33.0345
65.005
40.0133
65.005
40.0133
65
65.0079
65.0079
40.0211
65.0167
40
65
33
65
40
65
40
65
40
65.0179
40
65.0209
65.0173
40
40
65.0201
40
65.0119
40
65.0025
40
40
40
40
40
65.0149
40
65
40
65.0194
65.0193
65.0193
40
33.0064
65.0076
50.0152
65.0086
65.0083
40
65
65
33
65.0251
40
65.007
65.0286
40
65.098
65.0087
40
40
65.0125
40
65.0145
65.0147
40
65.0253
65.0251
40
65.0279
33.0726
65.0279
33.0726
65.0179
40
65.0157
40.0627
65.0157
33.0408
65.027
40
65.0251
33.0653
65.0251
65.025
40
65.0251
65.0251
40
65.0166
65.0167
40
65.0107
40
65.0314
40
65.0068
40
65.0256
40
65.0063
65.0123
65.0125
65.0151
65.0152
65.0152
40
65.0083
65.0209
33.0126
65.0251
65.0251
65.0251
40
65.0251
65.0251
33.0151
65.0193
65.0193
40
65.0201
40
65.0083
65.0083
40
65.0109
40
65.0526
40
65.0139
40
65.0105
65.0104
40
65.0125
40
65.0323
65.0327
40
65.0085
25.0085
65.019
25.019
65.0209
40
65.017
65.0169
40.0678
65.0303
65.0386
40
65.1192
65.12
40.16
65
33.125
65.0215
40.0572
65.0394
40.1575
40
65.0251
40
65.015
40.04
65.0314
40
65.0132
65.0109
40
65.0125
40.0501
65.0132
40
65.007
65.0072
40
65.0115
65.0114
40.0456
65.0167
40
65.0076
40
65.0157
33.0199
65
40
65
65
33.0183
65.0046
65.0045
33.0118
65.0001
65
33.0034
65.0179
33.0466
65.0167
33.01
65.0051
65.0209
33.0544
65.0193
33.0502
65.0209
33.0544
65.0123
65.0125
40
65.0113
40
65
40
65.0113
65.0376
40
65.0113
40
65.0113
40
65
40
65.041
65.0407
40
65.0314
40
65.0588
40
65.0125
40
65.0076
65.0064
50.0128
65.0251
40
65.0295
65.0296
40
65.1397
65.0279
40
65.1397
65.0279
40
65.0314
40
65.0405
65.0402
33.0295
65
25
65
65
40
65
65.0314
40
65.0275
40
65.0124
65.0123
40
65.0065
65.0065
40
65.0083
65.0345
65.0141
40
65.011
40
65.0279
40
40
65.0167
40.0669
65.0157
40
65
25
65.0167
40
65
40
65.042
65.042
33.0532
65.0085
25.0085
64.9999
65
40
65.0115
65.0114
40
65.0201
40
40
40
65
65.0462
65.0159
65.04
65.0093
65.0039
65.036
65.036
40
65.0088
25.0088
65.0112
25.0112
65
40
65.006
25.006
65.0363
40
65
65
40
30.0474
65.0279
40.1117
65.0725
40
65.0279
40
40
65.0314
40
65.0209
40
65.0279
25.0279
65
33
65.0314
33.0818
65
25
65
45
33
65.027
65.1397
65.0279
40
65.0314
40
65.1397
65.0279
40
65.0836
65.0167
40
65.0209
40
65.1395
65.1397
65.0279
40
65.1397
65.0279
40
65.0314
40
65.1397
65.0279
40
65.0314
40
65.0233
40.0465
65
40.0357
65.027
40.0541
65
40.0213
65
40.0286
65.0001
65
50.0133
65.0251
30.0503
65.0286
40.0571
65
40.0667
65
50.0556
65.0784
65.0157
40
40
65.0896
65.0179
40
65.0784
65.0157
40
65
40
65.012
40
65.0001
65
40
65.04
33.04
33.0328
65.048
65.0476
33.0476
65.0282
33.0508
65.0388
33.0233
65
65.0909
33.0909
65.036
65.042
50
65.0005
65
50
65.0178
65.0177
50.0353
65.0672
65.0667
33.0667
65.0672
65.0667
40
65.1348
65.1351
25.1351
65.0089
65.0139
65.0139
40
65.0125
65.0125
40
65.0096
40
65.0145
33.0145
65.0505
40
65.0562
40
65.0209
40
65.0209
40
65.0899
65.0896
65.0179
40
65.0835
65.0836
65.0167
40
65.0209
40
65.0345
40
65.0296
65.0459
40
65.0265
65.0588
40
65.0279
65.0538
50
65.042
50
65.0005
65
50.102
65.0633
50
65.035
50.0699
40
65.0193
40
65.0167
40
65.0123
65.0125
40
65.0208
65.0209
30
65.0066
65.0233
40
65.0279
40
65.0588
40
65.0398
65.04
40
65.0251
40
65.0435
40
40
65.0323
40
65.0435
40.1739
65.0228
40
65.0299
65.0297
40
65.0194
65.0193
40
65.0182
40
65.0131
65.0133
40
65.0588
40
65.0566
40
65.0167
40
65.0176
65.0179
40.0717
65.0086
65.0083
40
65.0155
65.0154
40
65.0109
40
65.0141
65.0139
40
65
40
65
40
65.0505
40
65.0289
40
65.0476
40.0952
65.048
65.0476
40
65
65.0251
30
65.04
40.08
65.037
40
65.037
40.0741
65.037
65.0167
40
65.036
40
65.0225
65.0228
30.0457
65.0345
65.0101
65.01
65.01
65.01
40
65.04
33.04
65.0079
65.0079
40
65.0136
65.0136
40
65.0218
33.0131
65.0314
33.0818
65.0101
65.01
65.01
40
65.011
65.0109
65.0109
40
65.0086
35.0259
65
40
65.0147
40
65
33
65.0086
65.0083
50.0167
65.0125
40
65.0054
40
65
65
65
40
65
50.0893
65.048
65.0476
50
65
50
65.0382
65.0382
65.0382
40
65.0091
65.0091
30.0183
65.0163
65.0163
40
65.0228
65.0228
30
65.0139
40
65.0139
40
65.0063
40
65.0165
40
65
40
65
40.082
65.0363
40
65.0199
40
65.0526
65.0249
65.0246
40
65.0193
40
65.0179
40
65.0145
65.0147
40
65.0169
65.0167
40
65.0566
50.0377
65.0157
50.0313
65.0228
40
65.0225
65.0228
40
65.0193
40
65.0251
50.0503
65.0139
65.0251
65.0909
40.1212
65.0193
40
65.0099
65.0101
40
65.0099
65.0101
40
65.0282
65.0279
40
65.0251
40
65.0253
65.0251
40
65.0282
65.0279
40.1117
65.0193
40
65.0167
65
40
65.0167
65.0132
65.0125
65.0251
40.1005
65.0251
40
65.0909
65.1042
65.1034
40.1379
65.1765
40
65.042
40.1681
65.0314
40
65.0251
65.042
65.037
65.1163
40
65.082
50
65.036
40
65.0633
65.0769
40
65.036
40
65.0073
40
65
40
65.0085
40
65.0073
40
65.0055
40
65.0088
40
65.0107
30
65.0251
40
65.042
65.0633
40.1266
65.0296
35.0296
65.0725
40
65.0519
40
65.0159
65.01
40
65.0086
65.0083
40
65.0083
40
65.0093
40
65.0149
40
65.0104
40
65.0086
40
65.0104
65.0141
40
65.0157
65.0186
40
65.0296
65.0296
33.0178
65.0136
40
40.0386
65.0186
65.0186
33.0435
65.0149
65.0147
33.0088
65.0505
33.0303
65.0359
65.036
33.0216
65.0111
40
50
65.0147
65.0147
40.0295
65.0265
65.0265
40
65.0314
40
65.0167
40
65.0176
65.0179
40
65.0147
33.0383
65.0179
40
65.0534
40
65.0575
40
65.0123
65.0125
65.0107
65.0109
65.0128
65.0127
65.0123
65.0125
50.0251
65.0123
65.0125
65.0147
40
65.0157
33.0408
65.0139
65.0125
65.0218
65.0218
40
65.0072
40
65.0435
65.0435
40
65.0093
35.0278
65
50
65.0107
65.0109
35.0327
65
65
33
65.0382
65.0382
33.028
65.0157
40
65.0209
40
65.0209
40
40
65.0175
30
65.0107
65.0107
40
65.0526
40
65.0169
40.0001
65
40
65.0391
65.0388
33.0233
65.0154
33.0154
65
35
65.0142
65.0141
40
65.0279
40
40
65.0228
40.0913
40
65.0055
40
65.0052
40
40
65.037
40.0741
65
40
65.0201
65.0177
65.0175
33.0175
65.0128
65.0127
45.0127
65.0256
33.0256
65.0526
65.0476
40
65.048
65.0476
40
65.027
33.027
65.0256
33.0256
65.0345
33.0345
65.0233
40
65.0047
33.0047
65.0125
33.0326
65.0083
33.0217
65.034
33.0612
65.0505
33.1313
65.0209
33.0544
65.0201
65.0279
40
65.0302
40
65.0251
65.0251
33.0151
65.0376
65.0176
65.0179
33.0466
65
65.007
65.0072
50.0143
65.0132
35.0396
65.0279
40
65.0139
35.0418
65.0179
40
65.0209
35.0628
65.0251
33.0151
65.0383
65.0386
40
65.0132
40
65.0072
40
65.0091
40
65.0086
65.0083
40
65.0256
65.0256
40
65.0152
40
65.0051
40
65.0083
65.0033
65.0032
40
65.0233
65.0233
65.0036
65.0036
65.0042
40
40
65.0228
65.0228
40
65.0179
65.0179
30
65.01
65.01
40
65.0336
65.0336
40
40
65.0228
65.0228
40
65.0265
65.0265
40
65.0179
65.0179
40
65.0167
40
65.0133
40
65.0413
40
65.0336
40
65.0179
65.0179
65.0143
30
65.0336
30
65
40
65.0198
40
65
65
40
65.0253
65.0251
40
65.036
40
65.036
65
40
65.0267
40
65.0526
40
65.017
65.0169
20
65.0587
65.0588
20
65.0769
40
65.0253
65.0251
40
65.0225
65.0228
40
65.0253
65.0251
33.0653
65.0115
40
65.0051
40
65.0769
33.0769
65.0189
40
65.0121
65.0119
40
65.0139
40
65
33
65
40
65
30
65.0286
30
65.0435
30
65.0147
40
65.031
65.0314
40
65.0251
65.0435
[truncated: 45,819 more rows]

## Sheet: histogram
midpoint	number of observations	frequency
0.05	6	0.000125476
0.15	80	0.00167301
0.25	598	0.0125058
0.35	18028	0.377013
0.45	5524	0.115521
0.55	5956	0.124556
0.65	13245	0.276988
0.75	2837	0.0593291
0.85	1510	0.0315781
0.95	34	0.000711029
total	47818
